# Supplementary material for: Synthesis of poly(vinylidene fluoride-co-bromotrifluoroethylene) and effects of molecular defects on microstructure and dielectric properties
Source: Royal Society of Chemistry journal article supplement (doi:10.1039/c4py00690a), 2014-01-01
Supplement: c4py00690a1.pdf [file c4py00690a1.pdf]

## Supporting Information

### Synthesis of Poly(vinylidene fluoride-co-bromotrifluoroethylene) and Effects of Molecular Defects on Microstructure and Dielectric Properties

Matthew R. Gadinski, Chalatorn Chanthad, Kuo Han, Lijie Dong, Qing Wang

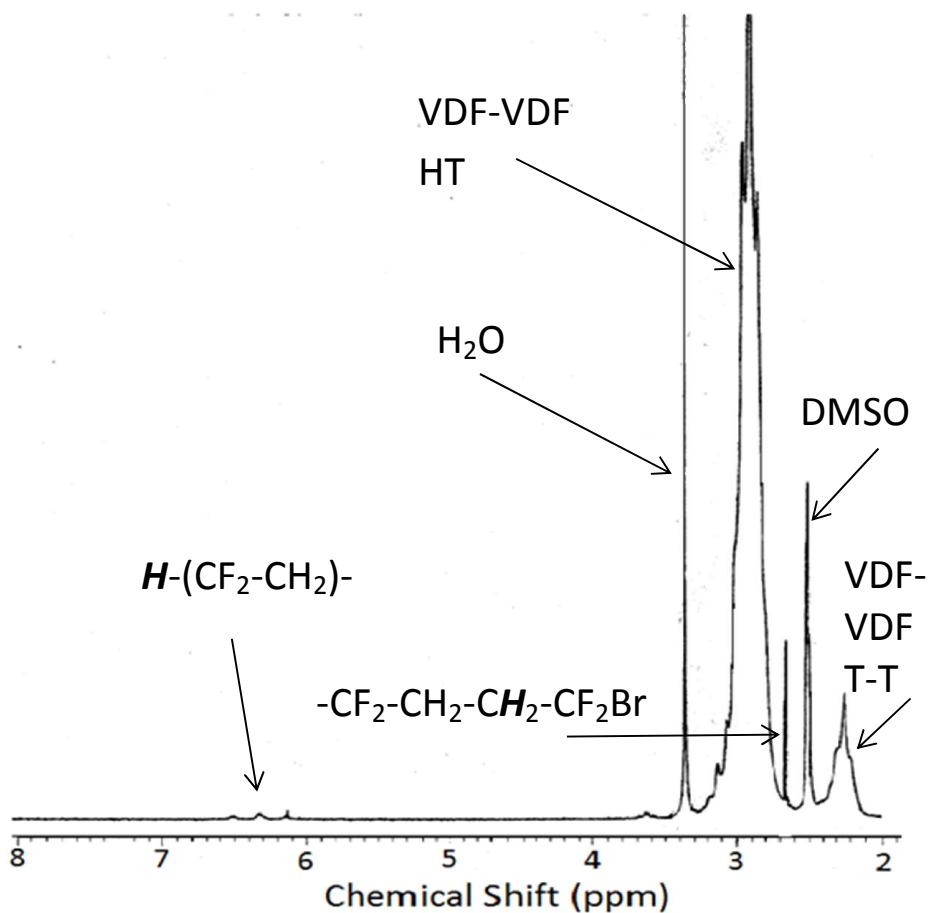

**Figure S1.** <sup>1</sup>H NMR spectrum of PVB7 in DMSO-d<sub>6</sub> against TMS internal standard for 299 MHz reference frequency at room temperature.

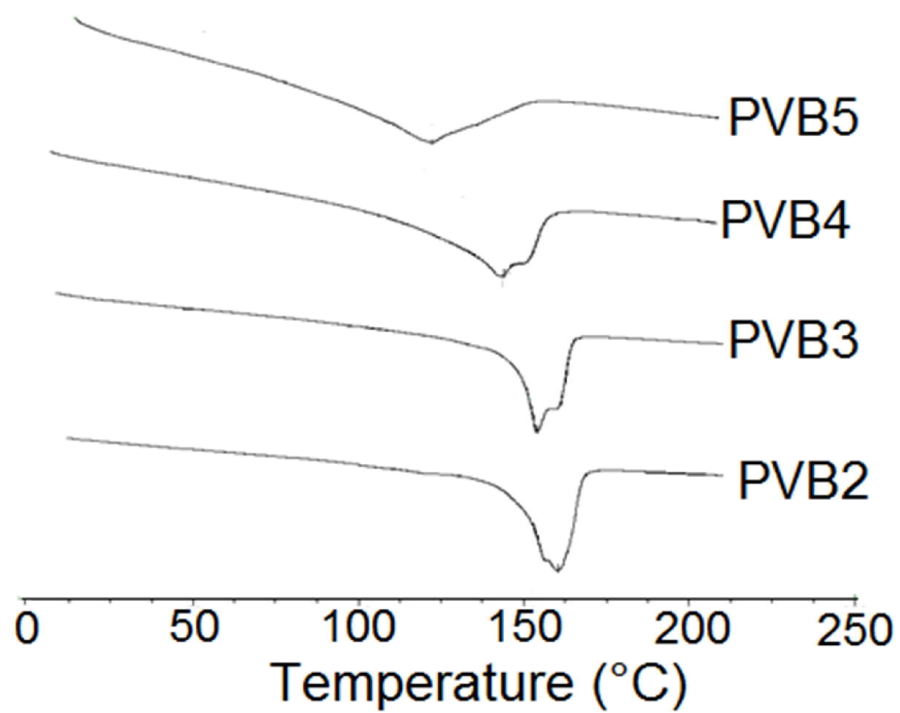

**Figure S2.** Melting Endotherms from DSC of Selected Copolymers at a rate of 10° C/min (no Curie transition is observed due to stabilization of the  $\alpha$  phase and overlap with melting).
